# Supplementary material
Source: PubMed Central journal article supplement (PMC5784824)
Supplement: NIHMS75083-supplement-1.pdf [file NIHMS75083-supplement-1.pdf]

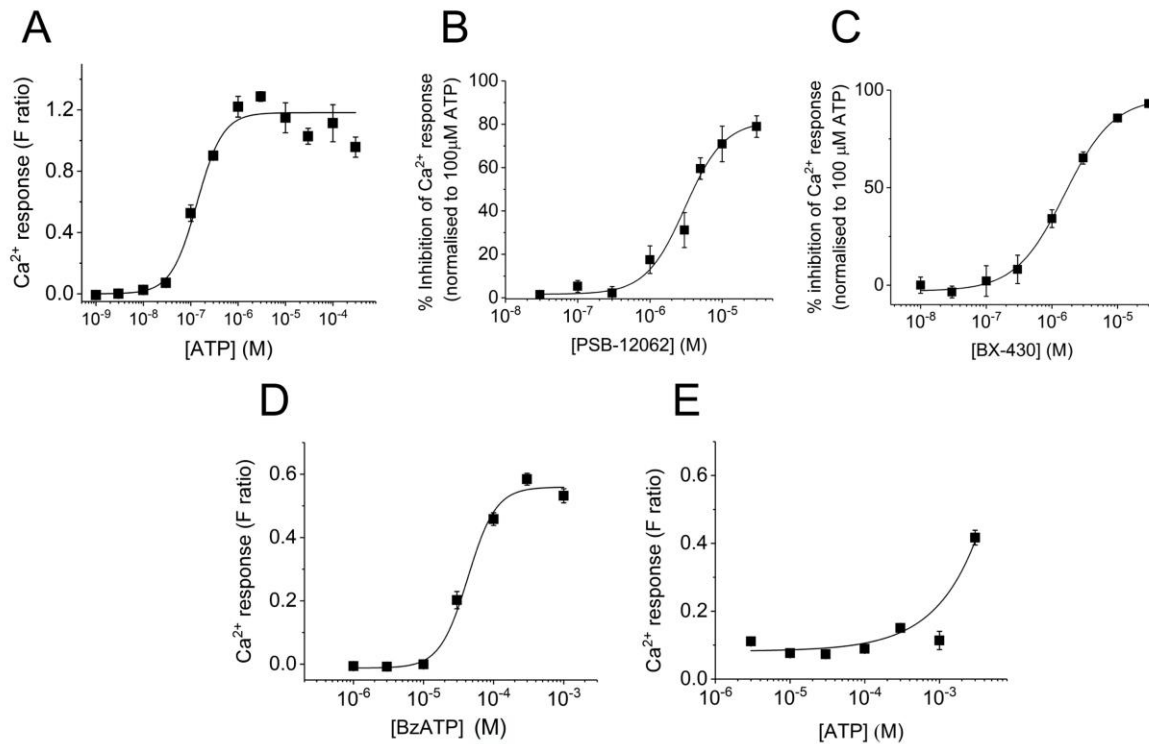

**Supplementary Figure 1. Concentration-inhibition curves for PSB-12062 and BX-430 using human P2X<sub>4</sub> stable cells, and agonist responses in human P2X<sub>7</sub> stable cells.** A) ATP concentration response (0.01  $\mu$ M – 300  $\mu$ M) of P2X<sub>4</sub> over-expressing 1321N1 astrocytoma cells ( $EC_{50} = 0.12 \pm 0.0031 \mu$ M; N=3). Inhibition curve of P2X<sub>4</sub> antagonist: B) PSB-12062 (0.03  $\mu$ M – 30  $\mu$ M;  $IC_{50} = 3.31 \pm 0.34 \mu$ M; N=3) and C) BX-430 (0.01  $\mu$ M – 30  $\mu$ M;  $IC_{50} = 1.56 \pm 0.085 \mu$ M; N=3) on P2X<sub>4</sub> over-expressing 1321N1 astrocytoma cells. D) BzATP concentration response (1  $\mu$ M – 1 mM) of P2X<sub>7</sub> over-expressing 1321N1 astrocytoma cells ( $EC_{50} = 43.4 \pm 7.23 \mu$ M; N=3). E) ATP concentration response (3  $\mu$ M – 3 mM) of P2X<sub>7</sub> over-expressing 1321N1 astrocytoma cells (no response observed below 3 mM ATP; N=3).

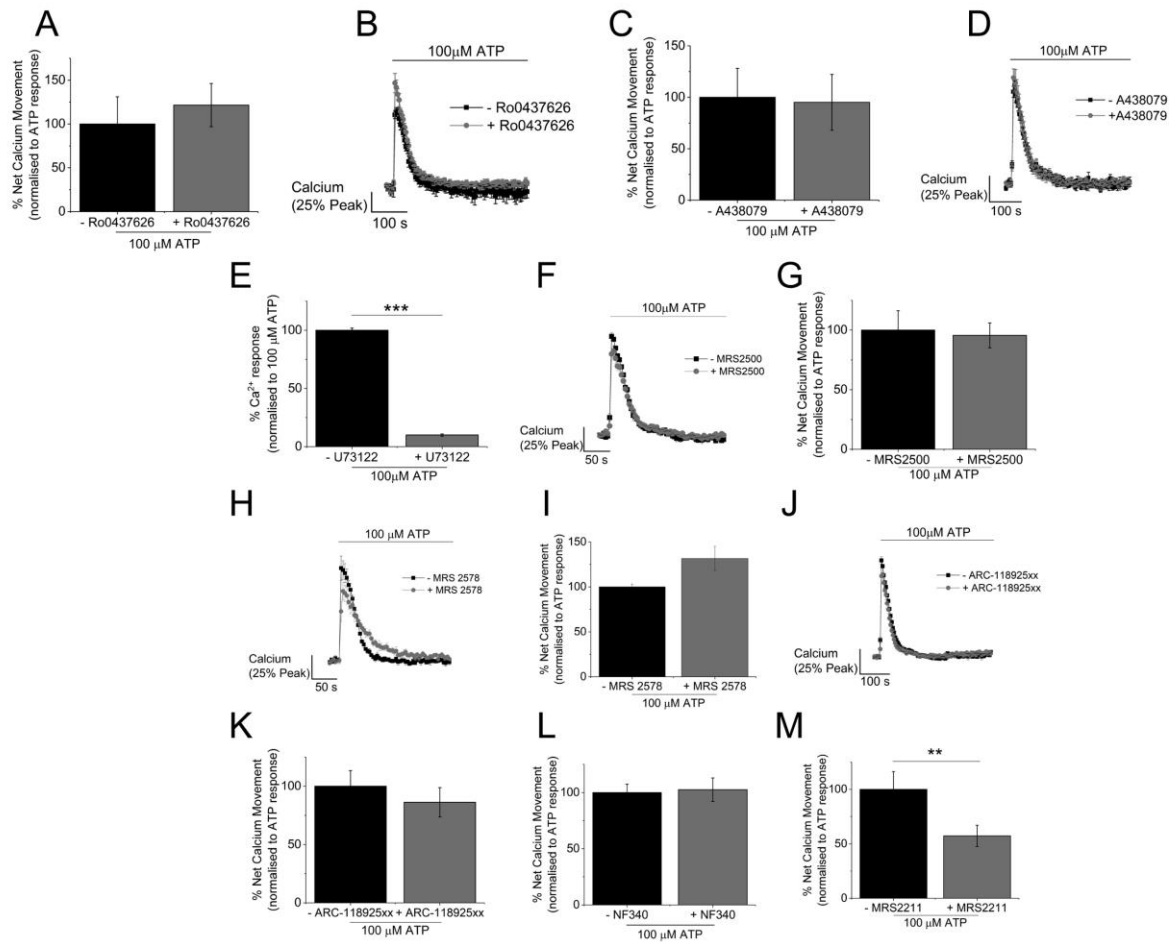

**Supplementary Figure 2. Effect of P2X and P2Y receptor antagonists on net  $\text{Ca}^{2+}$  movement in response to 100  $\mu\text{M}$  ATP in human MDMs.** Effect of: A and B) selective P2X<sub>1</sub> receptor antagonist (30  $\mu\text{M}$  Ro0437626; N=4 donors) and C and D) selective P2X<sub>7</sub> receptor antagonist (5  $\mu\text{M}$  A438079; N=4 donors) on net calcium movement and time-response curves of  $\text{Ca}^{2+}$  response. E) Effect of PLC inhibitor (10  $\mu\text{M}$  U-73122; N=3 donors) on peak magnitude of ATP-evoked  $\text{Ca}^{2+}$  response. Effect of P2Y selective antagonists on ATP-evoked  $\text{Ca}^{2+}$  response: F and G) P2Y<sub>1</sub> (1  $\mu\text{M}$  MRS2500, N=3 donors), H and I) P2Y<sub>6</sub> (10  $\mu\text{M}$  MRS2578; N=3 donors), J and K) P2Y<sub>2</sub> (10  $\mu\text{M}$  ARC-118925xx; N=3 donors), L) P2Y<sub>11</sub> (NF340; N=3 donors) and M) P2Y<sub>13</sub> (MRS2211; N=3 donors), on net calcium movement. Data is represented as normalized area under the curve to ATP response. Statistical significance is represented as \*  $p < 0.05$ , \*\*  $p < 0.01$  and \*\*\*  $p < 0.001$ .

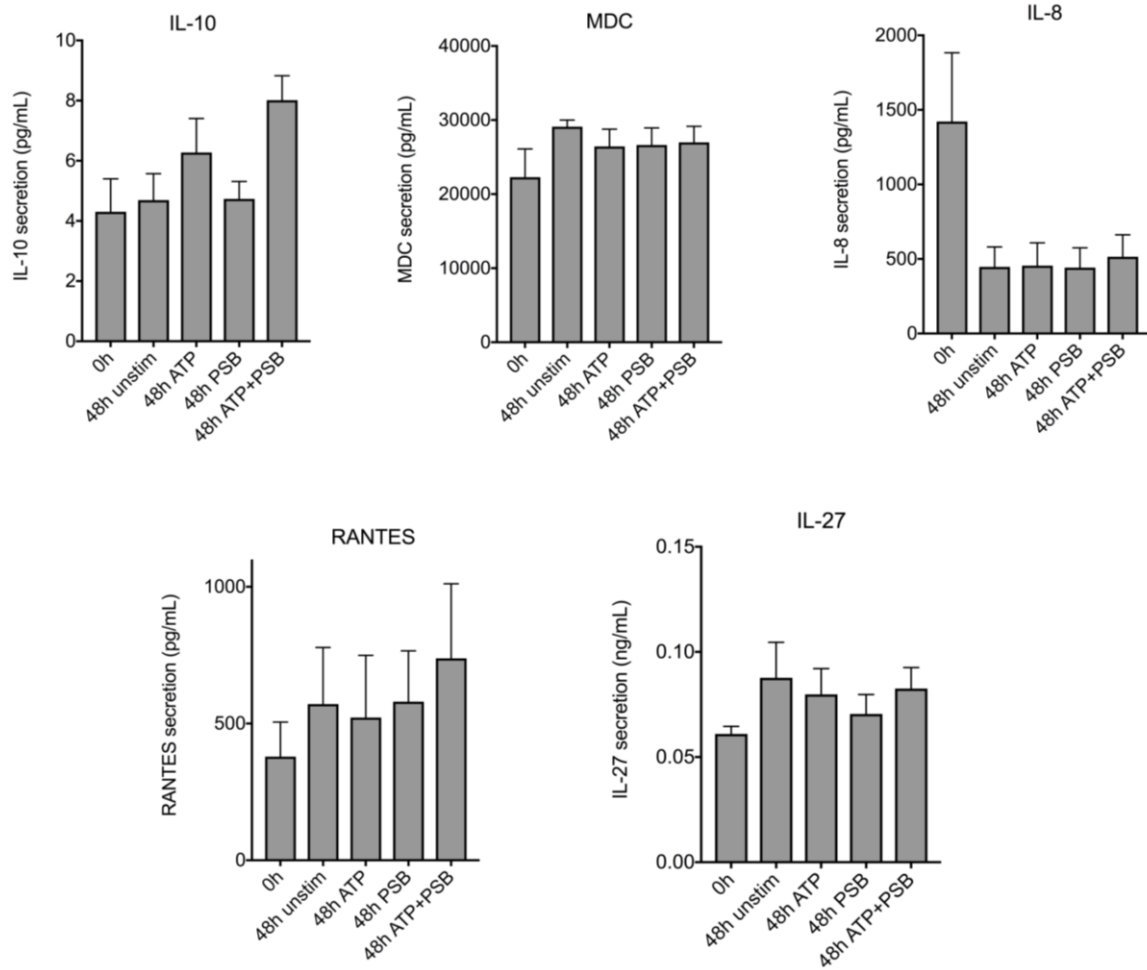

**Supplementary Figure 3.** Multiplex analysis of IL-10 (N=7 donors), MDC (N=7 donors), IL-8 (N=7 donors), RANTES (N=7 donors) and IL-27 (N=7 donors) under various conditions in human monocyte-derived macrophages.

| Calcium response normalized to 100% ATP            |                           |                           |                                                              |                                                               |
|----------------------------------------------------|---------------------------|---------------------------|--------------------------------------------------------------|---------------------------------------------------------------|
| Antagonist                                         | Peak magnitude            | Area under the curve      | Decay kinetics ( $\tau$ )                                    | Statistical significance                                      |
| P2X1 (30 $\mu$ M Ro0437626)                        | 131.29 $\pm$ 10.26% (N=4) | 131.27 $\pm$ 23.41% (N=4) |                                                              | Peak: $P < 0.01$<br>AUC: $P > 0.05$                           |
| P2X4 (5 $\mu$ M BX430)                             | 96.21 $\pm$ 4.61% (N=5)   | 42.28 $\pm$ 12.65% (N=5)  | Vehicle: 21.56 $\pm$ 10.88 s<br>BX430: 16.605 $\pm$ 10.55 s  | Peak: $P > 0.05$<br>AUC: $P < 0.05$                           |
| P2X4 (10 $\mu$ M PSB-12062)                        | 92.34 $\pm$ 2.71% (N=12)  | 61.03 $\pm$ 7.49% (N=12)  | Vehicle: 36.52 $\pm$ 3.17 s<br>PSB-12062: 28.06 $\pm$ 1.47 s | Peak: $P < 0.05$<br>AUC: $P < 0.01$                           |
| P2X7 (10 $\mu$ M A438079)                          | 112.77 $\pm$ 1.10% (N=4)  | 101.17 $\pm$ 22.20% (N=4) |                                                              | Peak: $P > 0.05$<br>AUC: $P > 0.05$                           |
| P2Y1 (1 $\mu$ M MRS2500)                           | 85.28 $\pm$ 7.66% (N=3)   | 100.55 $\pm$ 5.32% (N=3)  |                                                              | Peak: $P > 0.05$<br>AUC: $P > 0.05$                           |
| P2Y2 (10 $\mu$ M ARC-118925xx)                     | 86.45 $\pm$ 6.16% (N=3)   | 93.97 $\pm$ 7.77% (N=3)   |                                                              | Peak: $P > 0.05$<br>AUC: $P > 0.05$                           |
| P2Y6 (10 $\mu$ M MRS2578)                          | 73.85 $\pm$ 7.11% (N=3)   | 132.69 $\pm$ 17.73% (N=3) |                                                              | Peak: $P > 0.05$<br>AUC: $P > 0.05$                           |
| P2Y11 (10 $\mu$ M NF340)                           | 79.48 $\pm$ 3.20% (N=3)   | 106.14 $\pm$ 13.74% (N=3) | Vehicle: 22.03 $\pm$ 3.17 s<br>NF340: 22.64 $\pm$ 7.70 s     | Peak: $P > 0.05$<br>AUC: $P > 0.05$                           |
| P2Y13 (10 $\mu$ M MRS2211)                         | 69.59 $\pm$ 4.56% (N=3)   | 58.26 $\pm$ 4.20% (N=3)   | Vehicle: 22.03 $\pm$ 3.17 s<br>MRS2211: 35.17 $\pm$ 3.92 s   | Peak: $P > 0.05$<br>AUC: $P < 0.01$                           |
| P2Y11 (NF340) + P2Y13 (MRS2211)                    | 54.12 $\pm$ 4.29% (N=3)   | 77.47 $\pm$ 16.62% (N=3)  |                                                              | Peak: $P > 0.05$<br>AUC: $P > 0.01$                           |
| P2X4 (BX430) + P2Y11 (NF340) + P2Y13 (MRS2211)     | 48.27 $\pm$ 2.85% (N=4)   | 68.2 $\pm$ 12.63% (N=4)   |                                                              | Peak: $P < 0.05$ (against NF340 + MRS2211)<br>AUC: $P < 0.05$ |
| P2X4 (PSB-12062) + P2Y11 (NF340) + P2Y13 (MRS2211) | 53.52 $\pm$ 2.95% (N=4)   | 78.3 $\pm$ 16.56% (N=4)   |                                                              | Peak: $P > 0.05$ (against NF340 + MRS2211)<br>AUC: $P > 0.05$ |

**Supplementary Table 1. Effect of P2 receptor antagonists on the magnitude, shape (area under the curve), and decay kinetics ( $\tau$ ) of 100  $\mu$ M ATP-evoked  $Ca^{2+}$  responses in human MDMs.** Data is represented as normalized values to either 100% peak magnitude or 100% area under the curve of 100  $\mu$ M ATP- $Ca^{2+}$  response. Contribution of receptor activation towards shape of ATP-evoked  $Ca^{2+}$  response is assessed through measurements of decay kinetics as obtained through  $\tau$  value. Decay kinetic values are represented in seconds (s) Statistical significance is represented for each measurement with  $P > 0.05$  indicating non-significant change to vehicle data.
